# Supplementary material for: β-Ionone Synergizes with 5-Fluorouracil to Inhibit Gastric Cancer Progression through PAX6-Mediated Cell Cycle Arrest
Source: Research Square preprint supplement (doi:10.21203/rs.3.rs-7468716/v1), 2025-09-19
Supplement: Supplementary file 1 [file bb93d407f1777c862fc8b01b.docx]

**Supplementary Table 1 The sequences of siRNA oligo for PAX6**

| **Name** | **siRNA oligo** | |
| --- | --- | --- |
| PAX6-homo-1391 | sense | 5’-GCCAACACACCUAGUCAUAUTT-3 |
|  | antisense | 5’-AUAUGACUAGGUGUGUUGCTT-3’ |
| PAX6-homo-1727 | sense | 5’-CCACUUCAACAGGACUCAUTT-3 |
|  | antisense | 5’-AUGAGUCCUGUUGAAGUGGTT-3’ |
| siRNA-NC | sense | 5’-UUCUCCGAACGUGUCACGUTT-3 |
|  | antisense | 5’-ACGUGACACGUUCGGAGAATT-3’ |
| siRNA-NC FAM | sense | 5’-UUCUCCGAACGUGUCACGUTT-3 |
|  | antisense | 5’-ACGUGACACGUUCGGAGAATT-3’ |

**Supplementary Table 2 The IC50 or EC50 valuesof BI and 5-FU in gastric cancer (GC) cell lines (μmol/L)**

| **Compound** | **GC cells** | **24h IC50** | **48h EC50** | **72h EC50** |
| --- | --- | --- | --- | --- |
| BI | MKN45 | 807.1±117.0 | 439.3±57.1 | 287.4±27.1 |
| AGS | 553.3±106.1 | 339.4±150.2 | 320.0±25.2 |
| NCI-N87 | 546.2±137.6 | 447.1±163.0 | 293.0±17.0 |
| 5-FU | MKN45 | 9.3±4.6 | 0.9±0.5 | 0.44±0.13 |
| AGS | 326.0±42.1 | 30.2±15.0 | 27.3±1.5 |
| NCI-N87 | 97.2±15.1 | 22.4±7.1 | 9.0±1.0 |


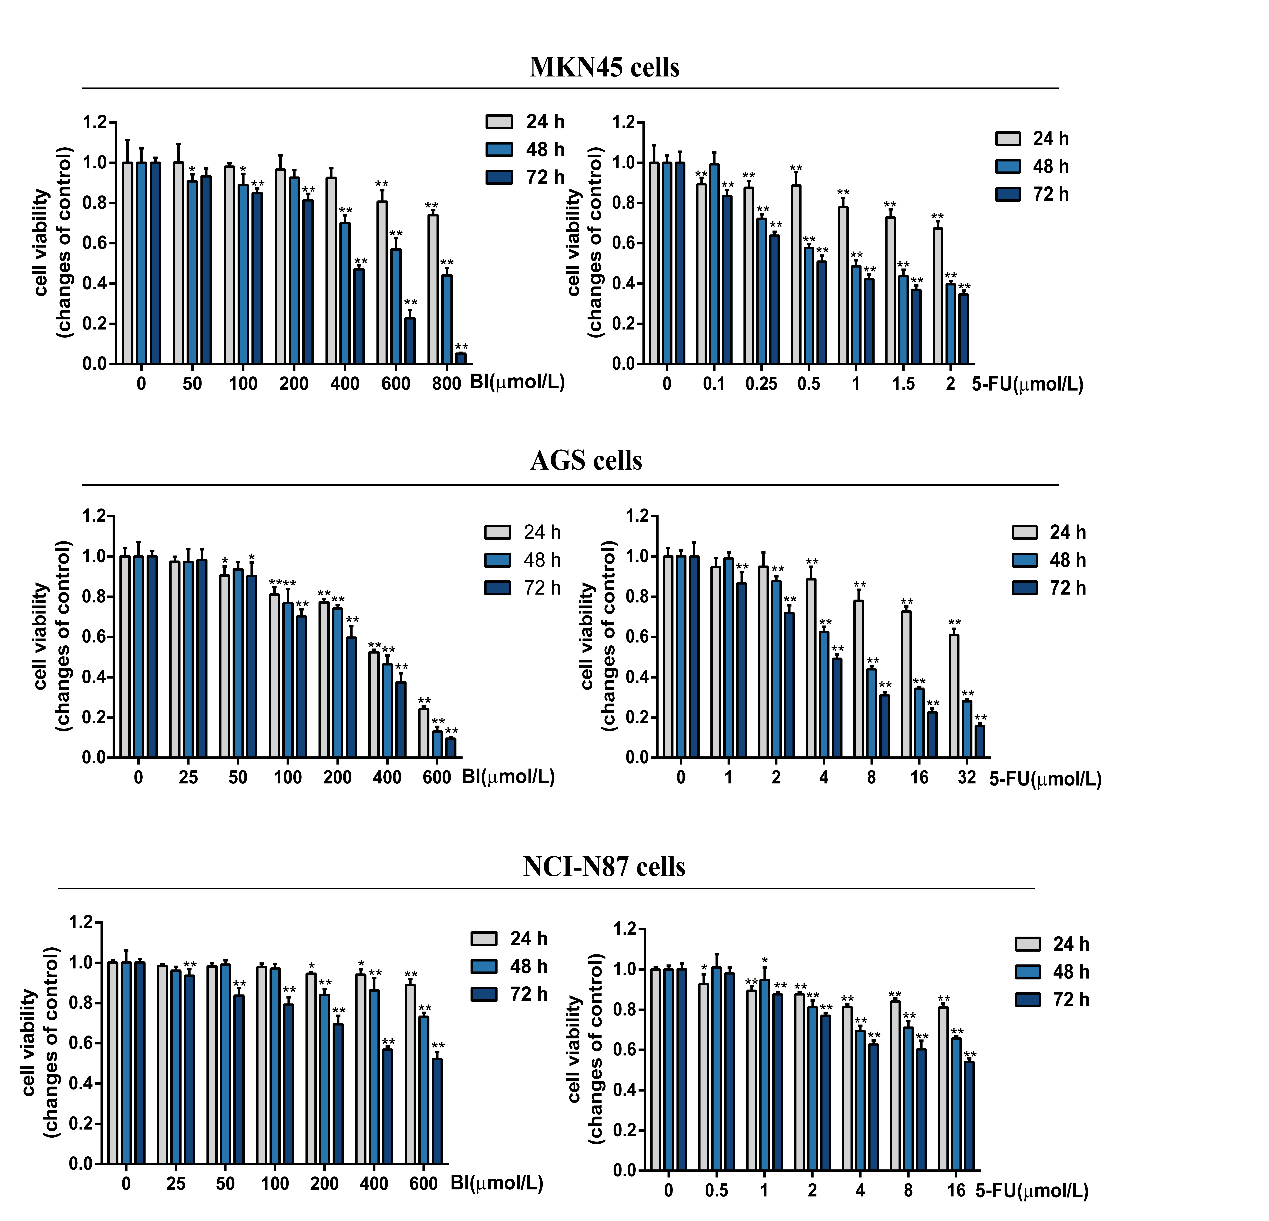


**Supplement figure1** MB assay detected the effects of BI and 5-FU at different concentrations and time on the viability of MKN45 cells, AGS cells, and NCI-N87 cells (n=5)
